# Supplementary material
Source: PubMed Central journal article supplement (PMC5411142)
Supplement: supp_pp.16.01930_PP2016-01930R1_Supplemental_Material_Fig_S2.pdf [file supp_pp.16.01930_PP2016-01930R1_Supplemental_Material_Fig_S2.pdf]

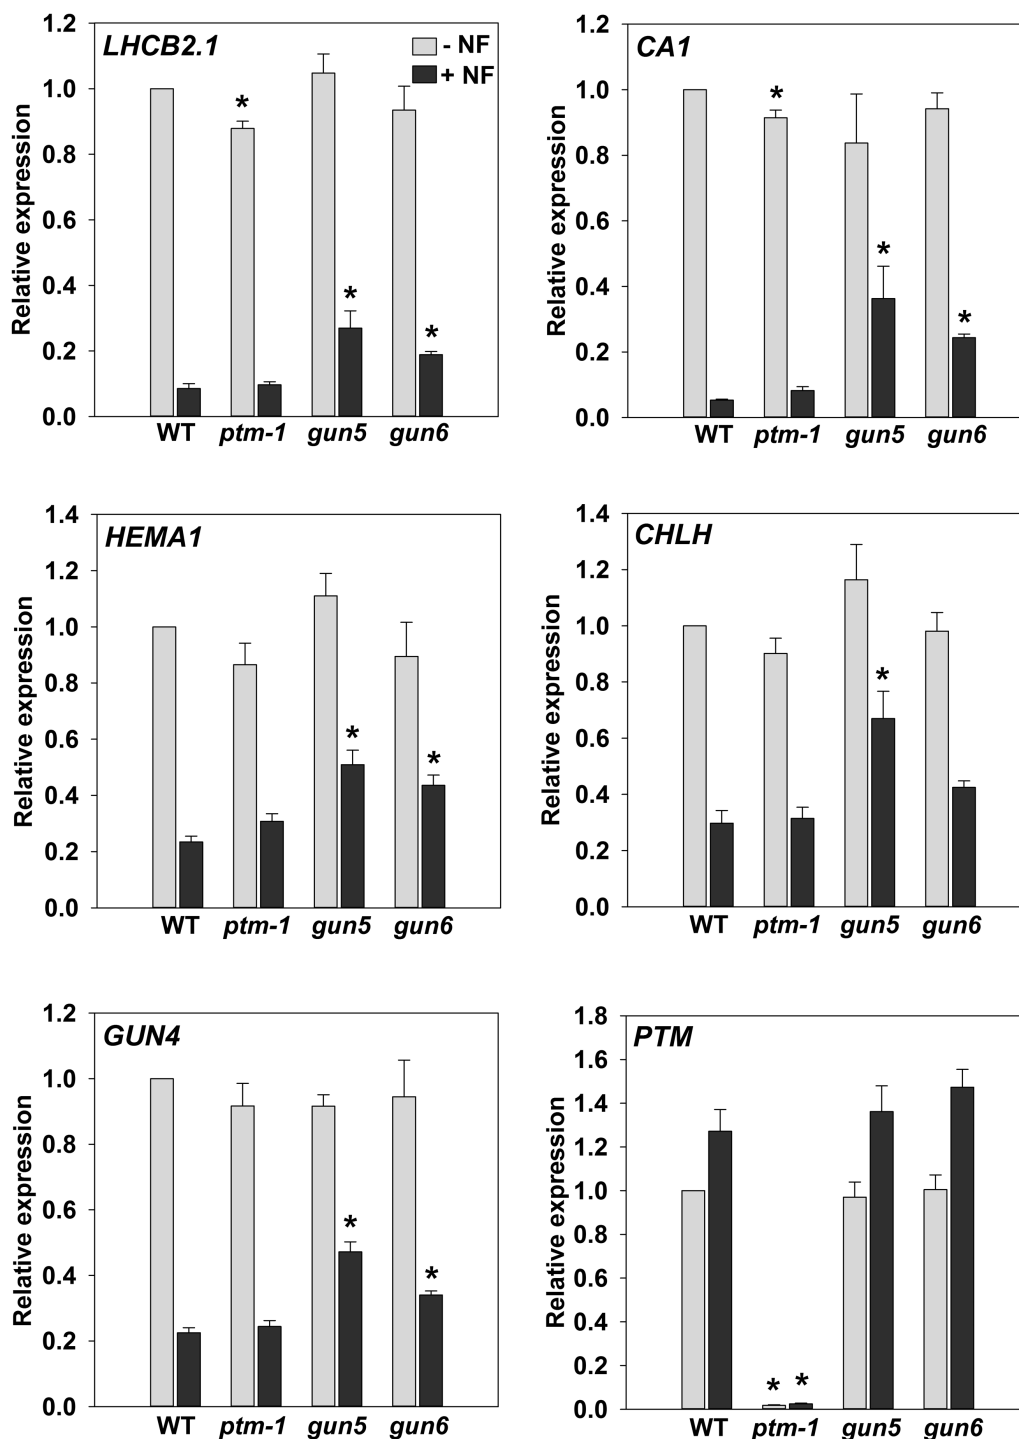

**Supplemental Fig. S2.** Normalisation of expression data to a different reference gene does not reveal a *gun* phenotype for *ptm-1*. Seedlings were grown on half-strength Linsmaier and Skoog medium supplemented with 2% sucrose and 0.8% agar (pH 5.8) with (dark grey bars) or without (light grey bars) 5  $\mu$ M NF under the following conditions: an initial 2 h WL treatment ( $120 \mu\text{mol m}^{-2} \text{s}^{-1}$ ) to stimulate germination, 4 d dark, 3 d WLc ( $120 \mu\text{mol m}^{-2} \text{s}^{-1}$ ). *genomes uncoupled 5* (*gun5*) and *gun6* mutants were included as positive controls (known to rescue nuclear gene expression on NF). Expression was determined with qRT-PCR and is relative to WT -NF and normalised to *YELLOW LEAF SPECIFIC GENE 8* (*YLS8*, At5g08290). Data shown are the means +SEM of three independent biological replicates. Asterisks denote a significant difference vs. WT for the same treatment (-NF or +NF), Student's *t*-test ( $p < 0.05$ ).
