# Supplementary material
Source: PubMed Central journal article supplement (PMC5411142)
Supplement: supp_pp.16.01930_PP2016-01930R1_Supplemental_Material_Fig_S3.pdf [file supp_pp.16.01930_PP2016-01930R1_Supplemental_Material_Fig_S3.pdf]

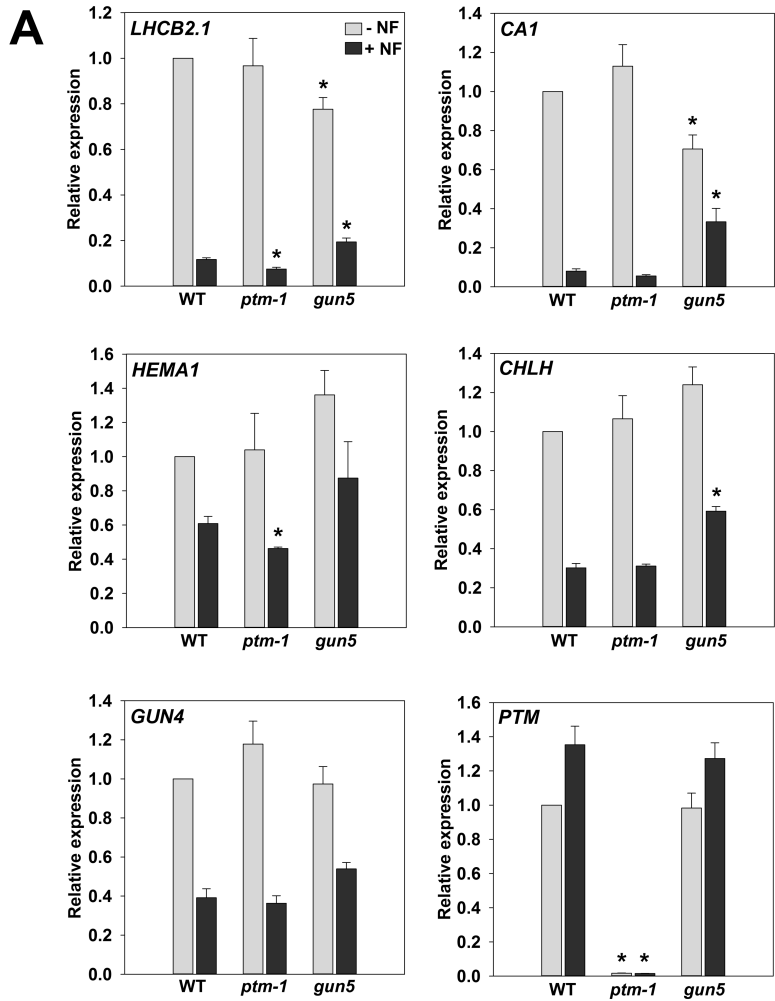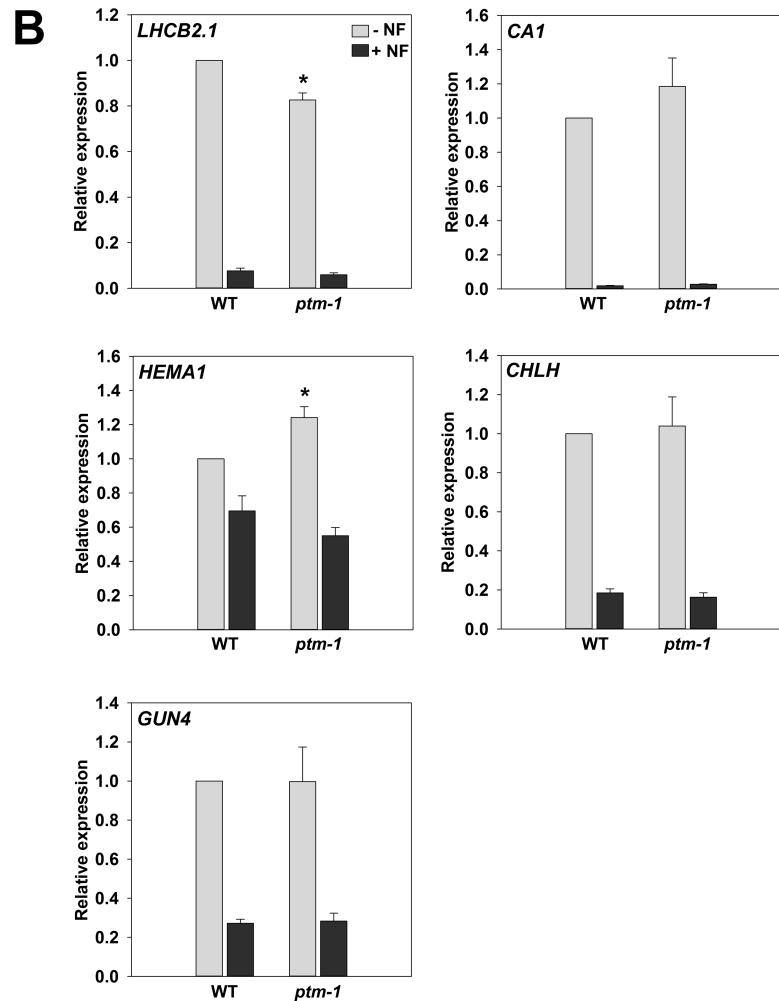

**Supplemental Fig. S3.** Growth under a third set of conditions fails to find a *gun* phenotype in *ptm-1*. Seedlings were sown onto half-strength Murashige and Skoog medium supplemented with 0.8% agar (pH 5.8) with (dark grey bars) or without (light grey bars) 5  $\mu$ M NF, and either in the presence (A) or absence (B) of 1% sucrose. For (A) and (B), seedlings were grown under the following conditions: an initial 2 h WL treatment (120  $\mu$ mol  $m^{-2} s^{-1}$ ) to stimulate germination, 3 d dark, 3 d WLC (120  $\mu$ mol  $m^{-2} s^{-1}$ ). *genomes uncoupled 5* (*gun5*) and *gun6* mutants were included as positive controls (known to rescue nuclear gene expression on NF). Expression was determined with qRT-PCR and is relative to WT -NF and normalised to *ACTIN DEPOLYMERISING FACTOR 2* (*ADF2*, At3g46000). Data shown are the means  $\pm$  SEM of three independent biological replicates. Asterisks denote a significant difference vs. WT for the same treatment (-NF or +NF), Student's *t*-test ( $p < 0.05$ ).
