# Supplementary material
Source: PubMed Central journal article supplement (PMC5411142)
Supplement: supp_pp.16.01930_PP2016-01930R1_Supplemental_Material_Fig_S4.pdf [file supp_pp.16.01930_PP2016-01930R1_Supplemental_Material_Fig_S4.pdf]

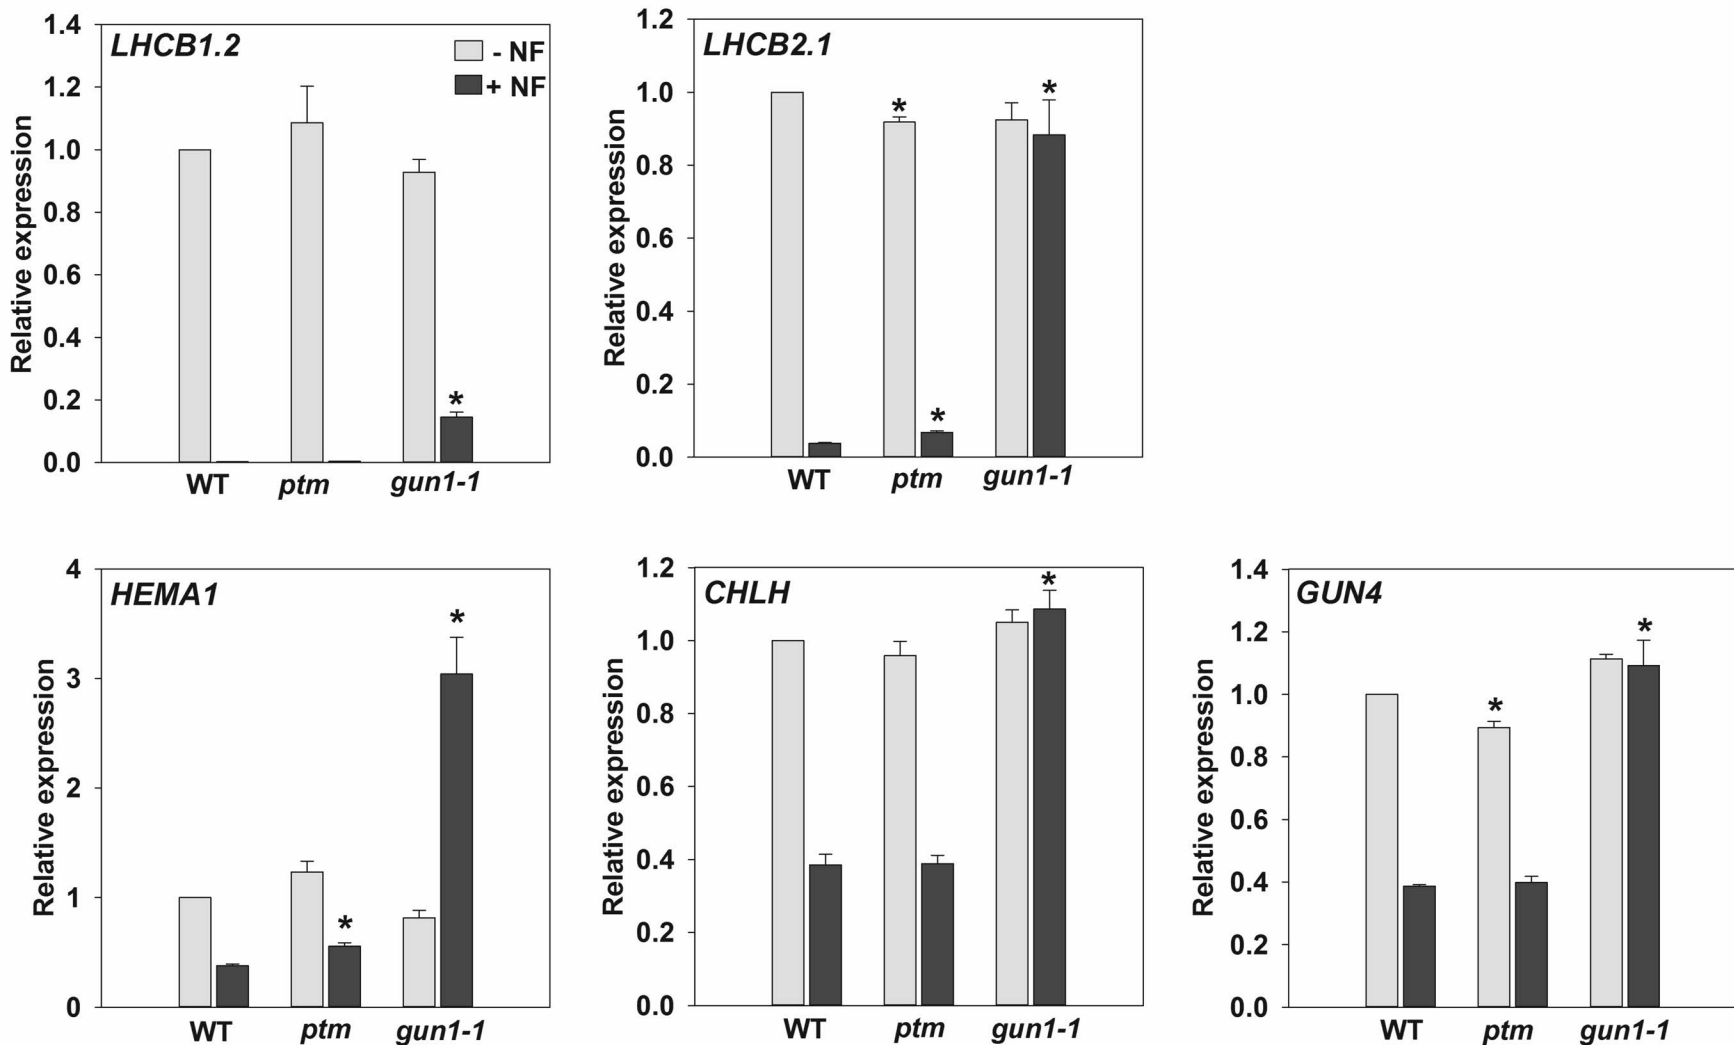

**Supplemental Figure S4.** The *ptm* mutant does not show a clear *gun* phenotype on Norflurazon (NF). Seedlings were grown on half-strength Murashige and Skoog medium supplemented with 1% sucrose and 1% agar (pH 5.8) with (dark grey bars) or without (light grey bars) 1  $\mu$ M NF under the following conditions: 2 d dark, 3 d WLc (100  $\mu$ mol m<sup>-2</sup>s<sup>-1</sup>). The *genomes uncoupled 1* (*gun1-1*) mutants was included as positive control (known to rescue gene expression on NF). Expression is relative to WT -NF and normalised to *YELLOW LEAF SPECIFIC GENE 8* (*YLS8*, At5g08290). Data shown are means +SEM of three independent biological replicates. Asterisks denote a significant difference vs. WT for the same treatment (-NF or +NF), Student's *t*-test ( $p < 0.05$ ).
