# Supplementary material
Source: PubMed Central journal article supplement (PMC5411142)
Supplement: supp_pp.16.01930_PP2016-01930R1_Supplemental_Material_Fig_S5.pdf [file supp_pp.16.01930_PP2016-01930R1_Supplemental_Material_Fig_S5.pdf]

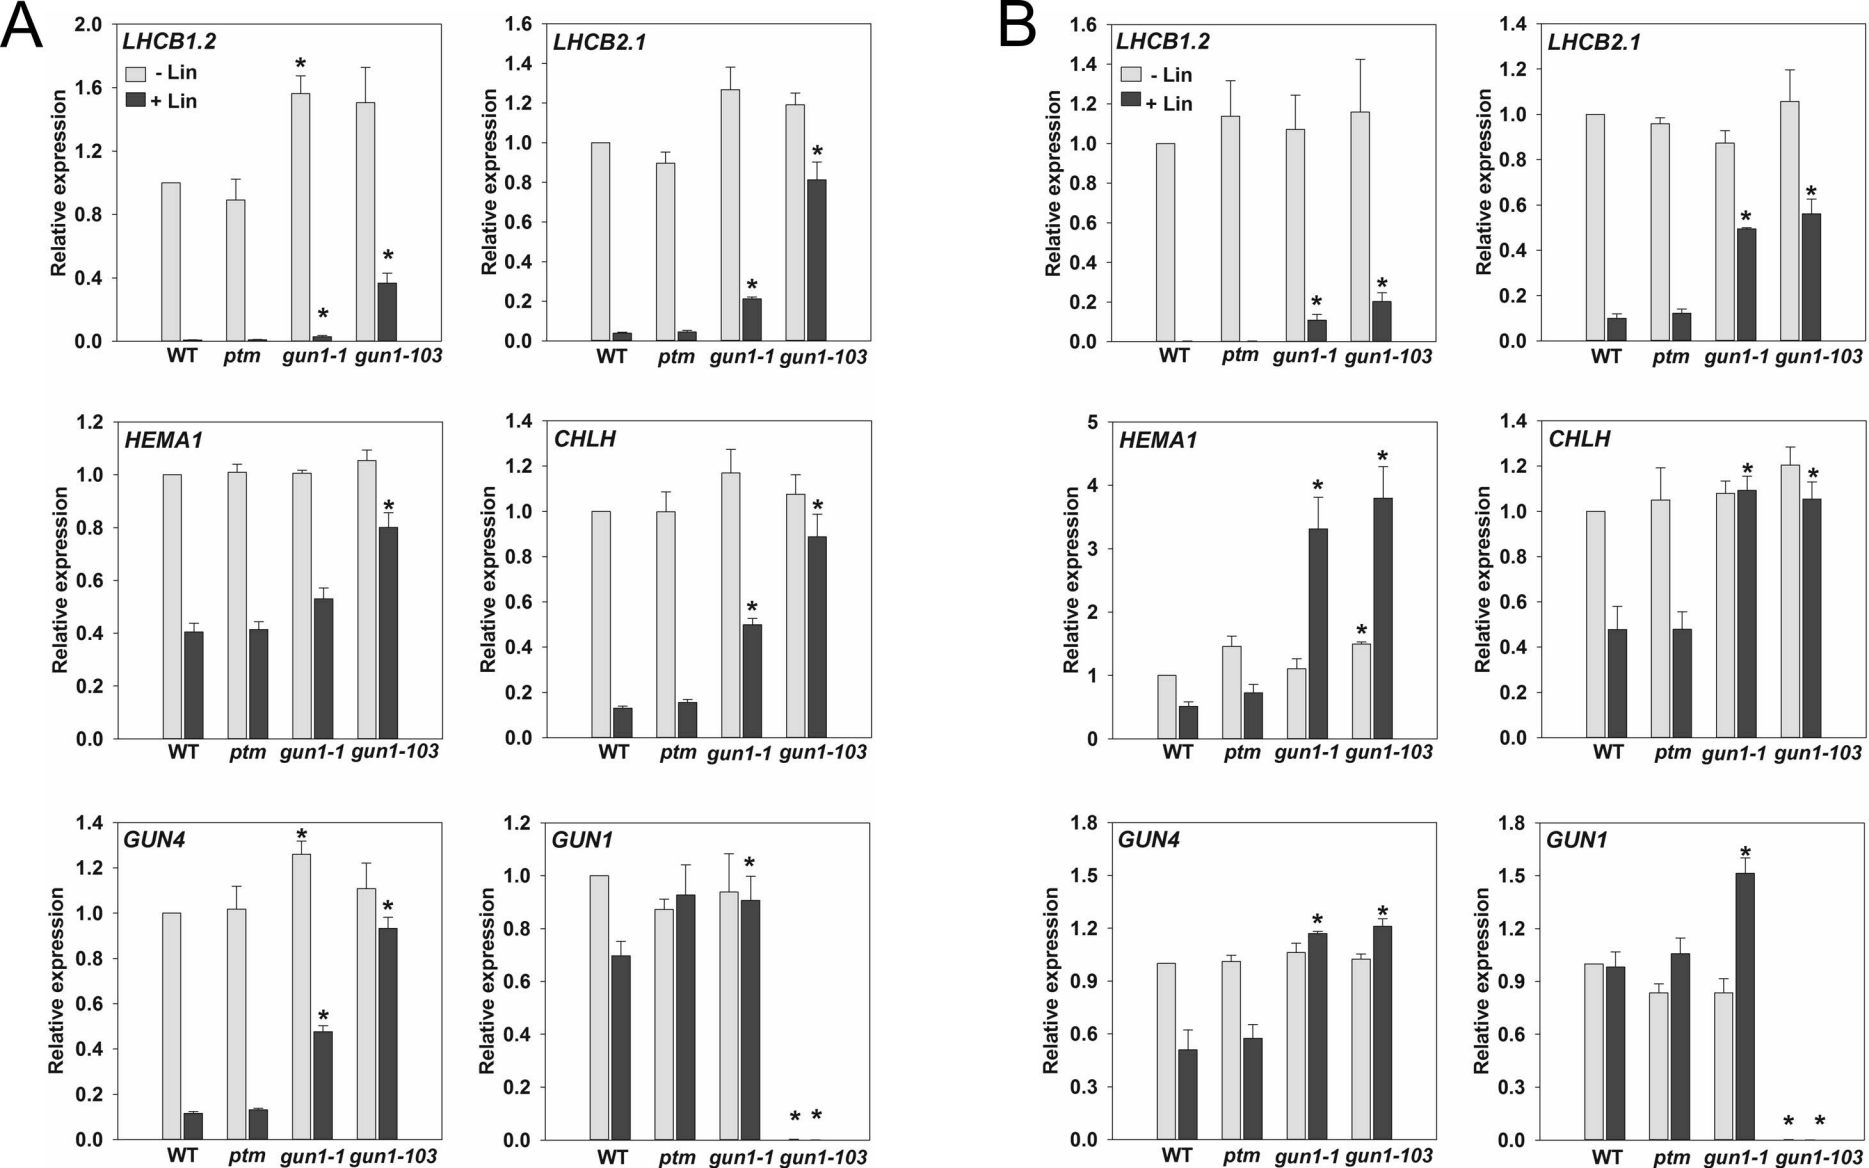

**Supplemental Figure S5.** The *ptm* mutant does not show a *gun* phenotype on lincomycin (Lin). Seedlings were grown on half-strength Linsmaier and Skoog medium supplemented with 2% sucrose and 0.8% agar (pH 5.8) with (dark grey bars) or without (light grey bars) 0.5 mM Lin in dark for 5 d (A), or (B) on half-strength Murashige and Skoog medium supplemented with 1% sucrose and 1% agar (pH 5.8) with (dark grey bars) or without (light grey bars) 0.5 mM Lin under the following conditions: 2 d dark, 3 d WLC ( $100 \mu\text{mol m}^{-2}\text{s}^{-1}$ ). For (A) and (B), two alleles of *genomes uncoupled 1* (*gun1-1* and *gun1-103*) mutants were included as positive control (known to rescue gene expression on Lin). Expression is relative to WT -Lin and normalised to *YELLOW LEAF SPECIFIC GENE 8* (*YLS8*, At5g08290). Data shown are means +SEM of three independent biological replicates. Asterisks denote a significant difference vs. WT for the same treatment (-Lin or + Lin), Student's *t*-test ( $p < 0.05$ ).
