# Supplementary material
Source: PubMed Central journal article supplement (PMC5411142)
Supplement: supp_pp.16.01930_PP2016-01930R1_Supplemental_Material_Table_S1.pdf [file supp_pp.16.01930_PP2016-01930R1_Supplemental_Material_Table_S1.pdf]

**Supplemental Table S1.** Primers used in this study.

| Primer Name | Gene name (AGI)            | Primer sequence (5' > 3')       | Amplicon length (bp) | Notes                                                                    |
|-------------|----------------------------|---------------------------------|----------------------|--------------------------------------------------------------------------|
| LP1         | <i>PTM</i> (At5g35210)     | TTGACAACATGCATCTCCATTG          | 1,098                | PCR genotyping <i>ptm-1</i> (WT band)                                    |
| RP1         |                            | CTAGCAGATTTGGTCATTGGG           |                      |                                                                          |
| LP2         | <i>PTM</i> (At5g35210)     | TACTTGGGGTTCCACAGAG             | 1,142                | PCR genotyping <i>ptm-2</i> (WT band)                                    |
| RP2         |                            | TTTTACCATGGCAAGAACTGC           |                      |                                                                          |
| LP          | <i>GUN1</i> (AT2G31400)    | ATGTTTAGTAGCCACGCATGG           | 1,110                | PCR genotyping <i>gun1-103</i> (WT band)                                 |
| RP          |                            | TTGATCGATGGGTAICTCGAAG          |                      |                                                                          |
| LB          | Salk_013123                | ATTTTGCCGATTCGGAAC              | 687 (with RP1)       | T-DNA primer for PCR genotyping <i>ptm</i> mutants (mutant bands)        |
|             | Salk_073799 (RP side)      |                                 | 661 (with RP2)       |                                                                          |
|             | Salk_073799 (LP side)      |                                 | 904 (with LP2)       |                                                                          |
| LB          | SAIL_742_A11               | GTGTACCAACAACGCTTTACAGC         | 760 (with RP)        | T-DNA primer for PCR genotyping <i>gun1</i> mutant (mutant band)         |
| qF1         | <i>PTM</i> (At5g35210)     | TCCTCTCTGGTATCAGTTTCC           | 181                  | qRT-PCR primer for <i>PTM</i> (Southampton)                              |
| qR1         |                            | CTCTGCCTCGGGTTTCCACA            |                      |                                                                          |
| qF2         | <i>PTM</i> (At5g35210)     | GTATAATCCTGGGTTAACGTATATTTCACTG | 103                  | qRT-PCR primer for <i>PTM</i> (Kyoto)                                    |
| qR2         |                            | CCCAACAACCTCAGGAATTTGTGAATC     |                      |                                                                          |
| Lhcb1.2_F   | <i>LHCB1.2</i> (At1g29910) | GTGTGACAATGAGGAAGACTGTTGCC      | 381                  | qRT-PCR primer for <i>LHCB1.2</i> (Kyoto)                                |
| Lhcb1.2_R   |                            | AAATGCTCTGAGCGTGGACCAAGCTA      |                      |                                                                          |
| Lhcb1.2_F   | <i>LHCB1.2</i> (At1g29910) | GAGTGAGAGACATGAGGAGAAAAG        | 60                   | qRT-PCR primer for <i>LHCB1.2</i> (Southampton)                          |
| Lhcb1.2_R   |                            | ACATCTGAAAGTCTCAAACCATC         |                      |                                                                          |
| Lhcb2.1_F   | <i>LHCB2.1</i> (At2g05100) | GTGACCATGCGTCTACCGTC            | 246                  | qRT-PCR primer for <i>LHCB2.1</i> (Kyoto)                                |
| Lhcb2.1_R   |                            | CTCAGGGAATGTGCATCCGAG           |                      |                                                                          |
| Lhcb2.1_F   | <i>LHCB2.1</i> (At2g05100) | CTCCGAAGTTGGTGTATC              | 142                  | qRT-PCR primer for <i>LHCB2.1</i> (Southampton)                          |
| Lhcb2.1_R   |                            | CGTTAGGTAGGACGGTGTAT            |                      |                                                                          |
| CA1_F       | <i>CA1</i> (At3g01500)     | GCTTCTTTCTCACTTCACTTTCTC        | 189                  | qRT-PCR primer for <i>CA1</i> (Southampton)                              |
| CA1_R       |                            | CAATGATAGGAGCAGGAGCG            |                      |                                                                          |
| HEMA1_F     | <i>HEMA1</i> (At1g58290)   | GCTTCTTCTGATTCTGCGTC            | 128                  | qRT-PCR primer for <i>HEMA1</i> (Southampton)                            |
| HEMA1_R     |                            | GCTGTGTGAATACTAAGTCCAATC        |                      |                                                                          |
| CHLH_F      | <i>CHLH</i> (At5g13630)    | CATTGCTGACACTACAACCTGC          | 145                  | qRT-PCR primer for <i>CHLH</i> (Southampton)                             |
| CHLH_R      |                            | CTTCTCTATCTCACGAACCTTTC         |                      |                                                                          |
| GUN1_F      | <i>GUN1</i> (AT2g31400)    | GCTACTAAACATACGCTCCATTG         | 115                  | qRT-PCR primer for <i>GUN1</i> (Southampton)                             |
| GUN1_R      |                            | TCGCTTTAGTCTCCGCTCTC            |                      |                                                                          |
| GUN4_F      | <i>GUN4</i> (At3g59400)    | CAATCTCACTTCGGACCAAC            | 121                  | qRT-PCR primer for <i>GUN4</i> (Southampton)                             |
| GUN4_R      |                            | TTGAAACGGCAGATACGG              |                      |                                                                          |
| ADF2_F      | <i>ADF2</i> (At3g46000)    | CGATTTGACTTTGTCACTGC            | 95                   | qRT-PCR primer for <i>ADF2</i> (Southampton) – reference gene            |
| ADF2_R      |                            | TCATCTTGTCTCACTTTGGC            |                      |                                                                          |
| YLS8_F      | <i>YLS8</i> (At5g08290)    | GCTGAAATATCCCGTGAACCTG          | 93                   | qRT-PCR primer for <i>YLS8</i> (Southampton) – reference gene            |
| YLS8_R      |                            | AATGGAGAACAACCGAAACAG           |                      |                                                                          |
| YLS8_F      | <i>YLS8</i> (At5g08290)    | AAGGACAAGCAGGAGTTTCTT           | 91                   | qRT-PCR primer for <i>YLS8</i> (Southampton) – reference gene            |
| YLS8_R      |                            | AGTAATCTTTGGAGCAATCACC          |                      |                                                                          |
| TUB2_F      | <i>TUB2</i> (At5g62690)    | CCAGCTTTGGTGATTTGAAC            | 102                  | qRT-PCR primer for <i>TUB2</i> (Kyoto) – reference gene                  |
| TUB2_R      |                            | CAAGCTTTCCGAGGTGAGAG            |                      |                                                                          |
| ACTIN_F     | <i>ACT2</i> (At3g18780)    | GGTAACATTGTCTCAGTGGTG           | 201                  | qRT-PCR primer for <i>ACT2</i> (Sun <i>et. al</i> 2011) – reference gene |
| ACTIN_R     |                            | CTCGGCCTTGGAGATCCACATC          |                      |                                                                          |
